# Supplementary material
Source: publisher site journal article supplement (https://www.dovepress.com/get_supplementary_file.php?f=280307.docx)
Supplement: Supplementary file 1 [file get_supplementary_file.php]

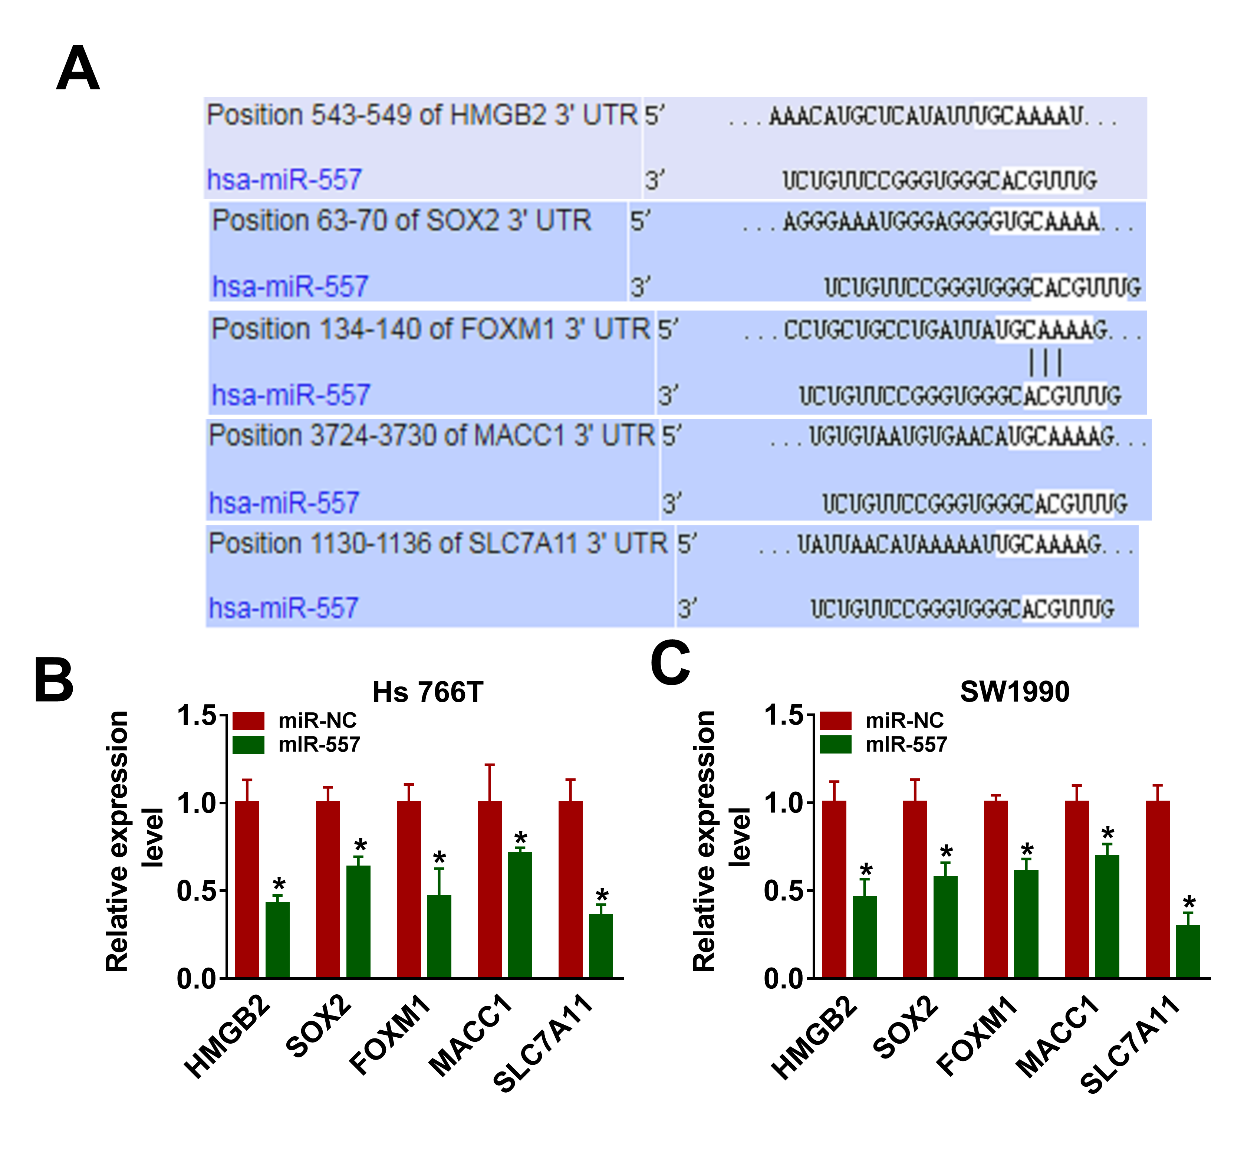


**Supplementary Figure 1. The candidate mRNA targets of miR-557.** (A) The predicted binding sites between miR-557 and its five candidate mRNA targets were shown. (B and C) The levels of five possible mRNA targets of miR-557 were examined in Hs 766T and SW1990 cells transfected with miR-NC or miR-557 by qRT-PCR. **P*<0.05.
